# Supplementary material
Source: publisher figshare collection journal article supplement (https://frontiersin.figshare.com/ndownloader/files/14063357)
Supplement: Supplementary file [file 14063357]

# ***Supplementary Material:***

## **The Impact of Autistic Traits on Self-Recognition of Body Movements**

### **1 INTRODUCTION**

An up-to-date version of this document and all supplementary materials can be found at the following repository.

<https://github.com/iamamutt/SRE>

The data can be obtained without installing the package. See `data/SRE.rda` or `inst/extdata/sre.csv` for a text version. Please review the `README.md` file for package installation instructions and how to use the exported R package functions.

#### **1.1 Dataset**

The dataset has 2448 rows and contains the following variables. Displayed are the column names, variable types, and a sample of their values.

- `id` (*integer*): [5, 24, 21, ...]
- `exp_date` (*character*): [03-Aug-2016, 04-Apr-2016, 04-Feb-2016, ...]
- `sub_age` (*numeric*): [21, 21, 35, ...]
- `sub_sex` (*factor*): [f, f, m, ...]
- `aq_score` (*integer*): [25, 11, 10, ...]
- `aq_category` (*factor*): [high symptoms, low symptoms, low symptoms, ...]
- `block` (*integer*): [1, 1, 2, ...]
- `trial` (*integer*): [1, 2, 3, ...]
- `action_category` (*factor*): [simple actions, complex actions, complex actions, ...]
- `action` (*factor*): [To Jump, To Stretch, To Fight, ...]
- `angle` (*factor*): [247, 180, 0, ...]
- `recog_acc` (*integer*): [1, 0, 1, ...]
- `recog_rt` (*numeric*): [11, 19, 21, ...]
- `conf_choice` (*integer*): [1, 1, 1, ...]
- `conf_rt` (*numeric*): [3.3, 2.2, 8.7, ...]
- `recog_corr_box` (*factor*): [4, 3, 4, ...]
- `recog_resp_box` (*factor*): [4, 2, 4, ...]
- `days_elapsed` (*integer*): [148, 75, 79, ...]
- `sub_age_scaled` (*numeric*): [0.41, 0.38, 3, ...]
- `aq_score_scaled` (*numeric*): [0.96, 0.13, 0.067, ...]
- `recog_rt_scaled` (*numeric*): [0.58, 1.2, 1.4, ...]
- `trial_scaled` (*numeric*): [-0.35, -0.33, -0.31, ...]

- `aq_score_standard` (*numeric*): [1.2, -0.031, -0.12, ...]

## 2 SUMMARY STATISTICS

The current section contains tables of summary statistics computed from the package dataset SRE.

### 2.1 Subject pool statistics

Information regarding the participant sample, such as their AQ scores, age, sex, and testing delay time is displayed below.

#### 2.1.1 Participant age

Table S1: Participant age by AQ groups.

| AQ   | N  | mean | sd   | min  | max  |
|------|----|------|------|------|------|
| High | 15 | 21.3 | 1.8  | 18.7 | 26.7 |
| Low  | 19 | 21.9 | 3.23 | 19.6 | 34.7 |
| .    | 34 | 21.6 | 2.68 | 18.7 | 34.7 |

#### 2.1.2 Test delay

Table S2: Delay between recording and test (days).

| AQ   | N  | mean   | sd     | min | max |
|------|----|--------|--------|-----|-----|
| High | 15 | 74.267 | 29.361 | 59  | 148 |
| Low  | 19 | 91.842 | 32.222 | 61  | 154 |
| .    | 34 | 84.088 | 31.788 | 59  | 154 |

#### 2.1.3 AQ scores

Table S3: AQ score by AQ groups.

| AQ   | N  | mean | sd   | min | max |
|------|----|------|------|-----|-----|
| High | 15 | 26.4 | 1.5  | 25  | 30  |
| Low  | 19 | 10.1 | 2.63 | 4   | 14  |
| .    | 34 | 17.3 | 8.52 | 4   | 30  |

Table S4: AQ score by sex.

| Sex | N  | mean | sd   | min | max |
|-----|----|------|------|-----|-----|
| F   | 21 | 18.8 | 8.29 | 8   | 30  |
| M   | 13 | 14.8 | 8.61 | 4   | 29  |
| .   | 34 | 17.3 | 8.52 | 4   | 30  |

Table S5: AQ score by AQ groups and sex.

| Sex | AQ   | N  | mean | sd   | min | max |
|-----|------|----|------|------|-----|-----|
| F   | High | 11 | 26.4 | 1.5  | 25  | 30  |
| F   | Low  | 10 | 10.5 | 1.96 | 8   | 13  |
| M   | High | 4  | 26.5 | 1.73 | 25  | 29  |
| M   | Low  | 9  | 9.56 | 3.28 | 4   | 14  |
| .   | .    | 34 | 17.3 | 8.52 | 4   | 30  |

## 2.2 Accuracy summary statistics

Summary statistics from the self-recognition accuracy column (`recog_acc` from the SRE dataset) are displayed below.

### 2.2.1 Accuracy for each subject, split by AQ group

Table S6: Accuracy by subject.

| AQ   | id | N  | mean | sd   | min  | max  |
|------|----|----|------|------|------|------|
| High | 8  | 72 | 0.81 | 0.4  | 0.29 | 0.81 |
| High | 14 | 72 | 0.72 | 0.45 | 0.29 | 0.81 |
| High | 29 | 72 | 0.72 | 0.45 | 0.29 | 0.81 |
| High | 19 | 72 | 0.71 | 0.46 | 0.29 | 0.81 |
| High | 9  | 72 | 0.69 | 0.46 | 0.29 | 0.81 |
| High | 26 | 72 | 0.65 | 0.48 | 0.29 | 0.81 |
| High | 32 | 72 | 0.64 | 0.48 | 0.29 | 0.81 |
| High | 2  | 72 | 0.57 | 0.5  | 0.29 | 0.81 |
| High | 5  | 72 | 0.53 | 0.5  | 0.29 | 0.81 |
| High | 13 | 72 | 0.5  | 0.5  | 0.29 | 0.81 |
| High | 12 | 72 | 0.42 | 0.5  | 0.29 | 0.81 |
| High | 22 | 72 | 0.38 | 0.49 | 0.29 | 0.81 |
| High | 31 | 72 | 0.38 | 0.49 | 0.29 | 0.81 |
| High | 10 | 72 | 0.35 | 0.48 | 0.29 | 0.81 |
| High | 1  | 72 | 0.29 | 0.46 | 0.29 | 0.81 |

Table S7: Accuracy by subject.

| AQ  | id | N  | mean | sd   | min  | max  |
|-----|----|----|------|------|------|------|
| Low | 18 | 72 | 0.88 | 0.33 | 0.39 | 0.88 |
| Low | 7  | 72 | 0.88 | 0.33 | 0.39 | 0.88 |
| Low | 21 | 72 | 0.83 | 0.38 | 0.39 | 0.88 |
| Low | 33 | 72 | 0.76 | 0.43 | 0.39 | 0.88 |
| Low | 23 | 72 | 0.72 | 0.45 | 0.39 | 0.88 |
| Low | 27 | 72 | 0.72 | 0.45 | 0.39 | 0.88 |
| Low | 11 | 72 | 0.67 | 0.47 | 0.39 | 0.88 |
| Low | 17 | 72 | 0.65 | 0.48 | 0.39 | 0.88 |
| Low | 24 | 72 | 0.64 | 0.48 | 0.39 | 0.88 |
| Low | 3  | 72 | 0.64 | 0.48 | 0.39 | 0.88 |
| Low | 28 | 72 | 0.64 | 0.48 | 0.39 | 0.88 |
| Low | 6  | 72 | 0.64 | 0.48 | 0.39 | 0.88 |
| Low | 15 | 72 | 0.62 | 0.49 | 0.39 | 0.88 |
| Low | 16 | 72 | 0.62 | 0.49 | 0.39 | 0.88 |
| Low | 20 | 72 | 0.61 | 0.49 | 0.39 | 0.88 |
| Low | 34 | 72 | 0.6  | 0.49 | 0.39 | 0.88 |
| Low | 4  | 72 | 0.51 | 0.5  | 0.39 | 0.88 |
| Low | 30 | 72 | 0.42 | 0.5  | 0.39 | 0.88 |
| Low | 25 | 72 | 0.39 | 0.49 | 0.39 | 0.88 |

### 2.2.2 Accuracy for each action

Table S8: Accuracy by action.

|         | Actions               | N   | mean | sd   |
|---------|-----------------------|-----|------|------|
| Complex | To Dance              | 136 | 0.86 | 0.35 |
| Complex | To Play an Instrument | 136 | 0.79 | 0.41 |
| Complex | To Hurry up           | 136 | 0.69 | 0.46 |
| Complex | To Get Attention      | 136 | 0.68 | 0.47 |
| Complex | To Fight              | 136 | 0.68 | 0.47 |
| Complex | To Play a Sport       | 136 | 0.66 | 0.47 |
| Complex | To Argue              | 136 | 0.66 | 0.47 |
| Complex | To Clean              | 136 | 0.65 | 0.48 |
| Complex | To Stretch            | 136 | 0.65 | 0.48 |
| Simple  | To Lift               | 136 | 0.72 | 0.45 |
| Simple  | To Jump               | 136 | 0.57 | 0.5  |
| Simple  | To Hammer             | 136 | 0.54 | 0.5  |
| Simple  | To Kick               | 136 | 0.54 | 0.5  |
| Simple  | To Push               | 136 | 0.53 | 0.5  |

|        | Actions  | N   | mean | sd  |
|--------|----------|-----|------|-----|
| Simple | To Punch | 136 | 0.46 | 0.5 |
| Simple | To Point | 136 | 0.44 | 0.5 |
| Simple | To Wave  | 136 | 0.44 | 0.5 |
| Simple | To Grab  | 136 | 0.43 | 0.5 |

### 2.2.3 Accuracy by participant sex

Table S9: Accuracy by sex.

| Sex | AQ   | N    | mean | sd   | min  | max  |
|-----|------|------|------|------|------|------|
| F   | Low  | 720  | 0.62 | 0.49 | 0.55 | 0.62 |
| F   | High | 792  | 0.55 | 0.5  | 0.55 | 0.62 |
| M   | Low  | 648  | 0.7  | 0.46 | 0.58 | 0.7  |
| M   | High | 288  | 0.58 | 0.49 | 0.58 | 0.7  |
| F   | .    | 1512 | 0.58 | 0.49 |      |      |
| M   | .    | 936  | 0.66 | 0.47 |      |      |

## 3 BAYESIAN HIERARCHICAL LOGISTIC REGRESSION MODELS

### 3.1 Model Specification

#### 3.1.1 Binomial Likelihood

We model participants' responses as a binary random variable, each participant providing a vector of values  $\mathbf{y}$  with either 1 for correct or 0 for incorrect. The model-predicted binary values  $\hat{\mathbf{y}}$  of the observed responses  $\mathbf{y}$  are the result of (1) applying an inverse link function  $g^{-1}$  to the linear predictor  $\boldsymbol{\eta}$ , providing a probability vector  $\tilde{\mathbf{y}}$  of real values constrained between 0 and 1, and (2) using a binary step activation function  $f$  to map the probability vector back to a binary response vector.

$$\begin{aligned}\mathbf{y} &= \hat{\mathbf{y}} + \boldsymbol{\epsilon} \\ \hat{\mathbf{y}} &= f(\tilde{\mathbf{y}}) \\ \tilde{\mathbf{y}} &= g^{-1}(\boldsymbol{\eta}) \\ \boldsymbol{\eta} &= \mathbf{X}\boldsymbol{\alpha} + \mathbf{Z}\boldsymbol{\beta}\end{aligned}$$

The linear predictor  $\boldsymbol{\eta}$  is on the logit scale and takes the form of a regression equation with its input as variables of interest and their estimated coefficients. Generalized linear models use a link function  $g$  to map the linear predictor to the dependent variable. If the response variable is Gaussian distributed, then the link and activation functions are simply the identity function.

$$\text{Identity : } g(x) = f(x) = x$$

To map logit scaled values to a probability vector constrained between 0 and 1 we use the inverse logit link function (sigmoid).

$$g^{-1}(\eta) = \frac{1}{1 + e^{-\eta}}$$

The binary step activation function creates the binary response vector  $\hat{\mathbf{y}}$  and is a simple thresholding operation at equal probability.

$$f(\tilde{y}) = \begin{cases} 0 & \text{for } \tilde{y} < 0.5 \\ 1 & \text{for } \tilde{y} \geq 0.5 \end{cases}$$

Thus, the combined steps from linear predictor value  $\eta_i$  to predicted response  $\hat{y}_i$  are

$$\hat{y}_i = f(g^{-1}(\eta_i))$$

The general form of a Bernoulli trial with  $n$  number of trials is a Binomial distribution with the probability mass function,

$$\binom{n}{y} \tilde{y}^y (1 - \tilde{y})^{n-y}$$

$$\tilde{y} = g^{-1}(\eta)$$

Table S10: Log-likelihoods of getting none to all four responses correct for a specific action, given that there are four options to choose for each trial.

| 0       | 1        | 2       | 3       | 4       |
|---------|----------|---------|---------|---------|
| -1.1507 | -0.86305 | -1.5562 | -3.0603 | -5.5452 |

Predictions on the logit scale are estimated from the data matrices  $\mathbf{X}$  and  $\mathbf{Z}$ , and their corresponding coefficients  $\boldsymbol{\alpha}$  and  $\boldsymbol{\beta}$ .

$$\hat{y}_i = X_i \boldsymbol{\alpha} + Z_i \boldsymbol{\beta}$$

Individual deviations from the mean predicted values (vector  $\epsilon$ ) are referred to here as *error*, and together make up the observed values of  $y$ .

$$\mathbf{y} = \hat{\mathbf{y}} + \boldsymbol{\epsilon}$$

No-U-Turn, a variant of the Hamiltonian Monte Carlo algorithm that automates the algorithms parameters, converges to the target probability space for the estimated parameters by avoiding random walks associated with Metropolis-Hastings or Gibbs sampling (Carpenter et al., 2017; Homan & Gelman, 2014). MCMC algorithms used to estimate model parameters condition on the data using Bayes rule. Denoting  $\boldsymbol{\Theta}$  to refer to the collection of parameters being estimated, then

$$p(\boldsymbol{\Theta}|\mathbf{y}) = \frac{p(\mathbf{y}|\boldsymbol{\Theta})p(\boldsymbol{\Theta})}{p(\mathbf{y})}$$

The normalizing constant in the denominator of the right-hand side of the equation is ignored given that the numerator is proportional to the left-hand side of the equation. The  $p(\mathbf{y}|\boldsymbol{\theta})$  portion from the equation above is the likelihood component, and the prior component, assumptions about how the parameters are distributed, consists of the  $p(\boldsymbol{\theta})$  portion.

### 3.1.2 Priors

Further breaking down the priors component  $p(\boldsymbol{\theta})$ , we specify the distributions of the parameter vectors  $\boldsymbol{\alpha}$  and  $\boldsymbol{\beta}$ .  $\boldsymbol{\alpha}$  is a single column-vector of parameters that account for the observation-level fixed effects (unmodeled, responses at the trial level), which do not vary by group. These are mapped to the fixed effects design matrix  $\mathbf{X}$ . They don't include an intercept term ( $\alpha_0$ ), since this is estimated separately to avoid unidentifiability issues across multiple levels of a hierarchical model.

$$\boldsymbol{\alpha} = \alpha_1, \dots, \alpha_p$$

The  $\boldsymbol{\alpha}$  coefficients are given a student's  $t$  distribution with degrees of freedom parameter  $\nu$ , mean  $\mu$ , and standard deviation  $\sigma$ . The  $t$  prior has fat tails and is robust to estimating outlier coefficients without over-inflating the standard deviation estimate in order to capture these coefficients (Ghosh, Li, & Mitra, 2015). Assuming that the variables have been rescaled to where  $X$  is on the unit scale (most values range between 0 and 1), then the following values for the parameters are used

$$\boldsymbol{\alpha} \sim t(4, 0, 2.5)$$

The average predicted value is estimated by the intercept term and is also given a  $t$  prior, but with a standard deviation of 10.

$$\alpha_0 \sim t(4, 0, 10)$$

The vector  $\beta$  is a set of parameters for every group member (e.g., a random sample of participants or items in an experiment) that maps to a sparse random effects matrix  $\mathbf{Z}$ . If there are  $K$  parameters to be estimated for every member within a group with  $J$  members, then there are  $J * K$  parameters to be estimated for  $\beta$ . The parameters  $\beta$  are coerced into a vector from an original  $J \times K$  matrix  $\hat{\beta}$  by transposing, traversing columns, and stacking the values into a single vector.

$$\beta = \text{vectorize}(\hat{\beta}')$$

The  $\hat{\beta}$  matrix is sampled from a Multivariate Normal distribution with mean vector  $\mathbf{U}_j\gamma$  and covariance matrix  $\Sigma$ . Each row  $\mathbf{U}_j$  for all  $J$  make up the matrix  $\mathbf{U}$ , and is a  $J \times L$  design matrix of the group-level fixed effects (similar to  $X$ , but predictors specific to groups), with  $L$  being the number of group-level predictors (including the intercept term).

$$\hat{\beta}_j \sim \mathcal{N}(\mathbf{U}_j\gamma, \Sigma)$$

The matrix  $\gamma$  is an  $L \times K$  matrix of group level regression coefficients with each row having their own regression equation of group-level fixed effects. These coefficients are also given  $t$  priors.

$$\gamma \sim t(4, 0, 2.5)$$

The covariance matrix  $\Sigma$  is derived from multiple components, each with their own set of priors. First, we start by estimating the standard deviation vector  $\sigma_\beta$ . This ultimately specifies the scale of the varying coefficients in  $\hat{\beta}$ . We also estimate a separate correlation matrix  $\Omega$  that determines how the  $\hat{\beta}$  coefficients vary in relation to each other. With these two components we can compute the covariance matrix associated with  $\hat{\beta}$ .

$$\Sigma = \text{diag}(\sigma_\beta) \Omega \text{diag}(\sigma_\beta)$$

The standard deviation vector  $\sigma_\beta$  from the covariance matrix  $\Sigma$  is composed of the average variance  $\tau^2$ , and a partitioning vector  $\pi$  (unit simplex) that determines the proportion of total variance among the set of  $K$  predictors. The sum of the diagonal elements (the trace) of  $\Sigma$  is  $K\tau^2$ .

$$\sigma_\beta = K\tau^2\pi$$

The average standard deviation  $\tau$  is a scalar value and is given a Gamma distribution with some priors on the shape and scale parameters. These influence the overall scale of the covariance matrix, but are typically used to control the bias of the variances, pushing them closer to or further away from zero.

$$\tau \sim \text{Gamma}(\tau_a, \tau_b)$$

$$\tau_a = 1$$

$$\tau_b = 1$$

The variance partitioning vector  $\boldsymbol{\pi}$  sums to 1, and can be generated from a Dirichlet distribution given a set of concentration parameters  $\boldsymbol{\theta}$ .

$$\boldsymbol{\pi} \sim \text{Dirichlet}(\boldsymbol{\theta}) = \pi_{1,\dots,K} \sim \text{Dirichlet}(\theta_{1,\dots,K})$$

The concentration parameters  $\boldsymbol{\theta}$  control the spread of the variances in  $\boldsymbol{\sigma}_\beta^2$ , and themselves are given a Gamma distribution with some concentration prior  $\zeta$  for the shape parameter and scale set to 1. If  $\zeta < 1$ , then variances are largely heterogeneous. When  $\zeta = 1$ , variance proportions are uniform (no prior information), and when  $\zeta > 1$ , variances are increasingly homogeneous.

$$\boldsymbol{\theta} \sim \text{Gamma}(\zeta, 1)$$

$$\zeta = 1$$

If the shape and scale parameters from a Gamma distribution are constants then using  $\boldsymbol{\theta}$  for sampling from the Dirichlet distribution can be skipped and instead,

$$\boldsymbol{\pi} = \frac{\boldsymbol{\theta}}{\sum_{k=1}^K \theta_k}$$

Lastly, the correlation matrix is given a LKJ prior (estimated from several Beta distributions, see Lewandowski, Kurowicka, & Joe, 2009) which takes a single parameter  $\eta$  (not to be confused with the linear predictor). The parameter  $\eta$  is a regularization term, which controls the strength of correlations among all pairwise predictors. If  $\eta > 1$ , then stronger correlations are less likely by constraining the diagonal elements to be “peaked”, or maintain larger values relative to the off-diagonal elements. If  $\eta < 1$ , the values on the off-diagonal become larger and stronger correlations are more likely. A value of 1 is Uniformly distributed over all possible correlation matrices, and a value of 2 corresponds to  $L2$  regularization.

$$\boldsymbol{\Omega} \sim \text{LKJcorr}(\eta)$$

$$\eta = 2$$

### 3.2 MCMC convergence information

Trace plots of each MCMC chain (to ensure samples are not stuck within some region of the target distribution),  $\hat{R}$  statistics for gauging chain divergence ( $\hat{R} = 1$  is best), and the effective number of samples from the total sample size (a ratio of 1 is best) are shown.

### 3.2.1 Model 1 convergence diagnostics plots

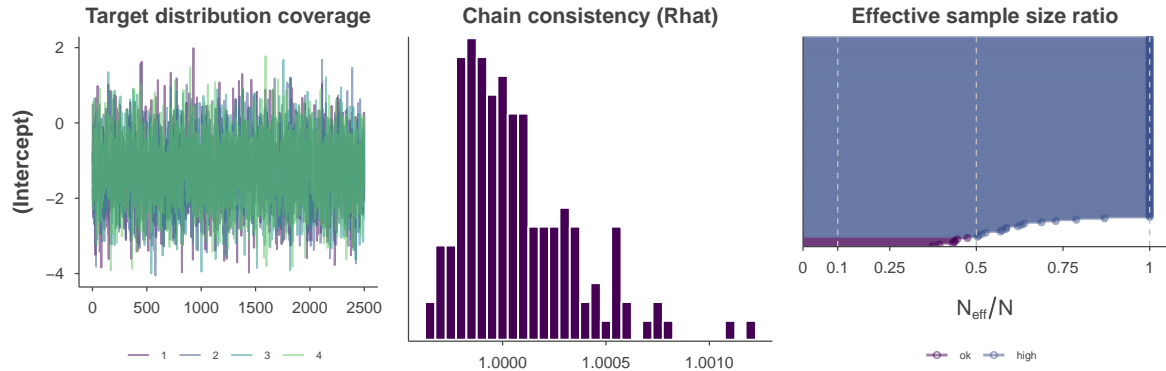

### 3.2.2 Model 2 convergence diagnostics plots

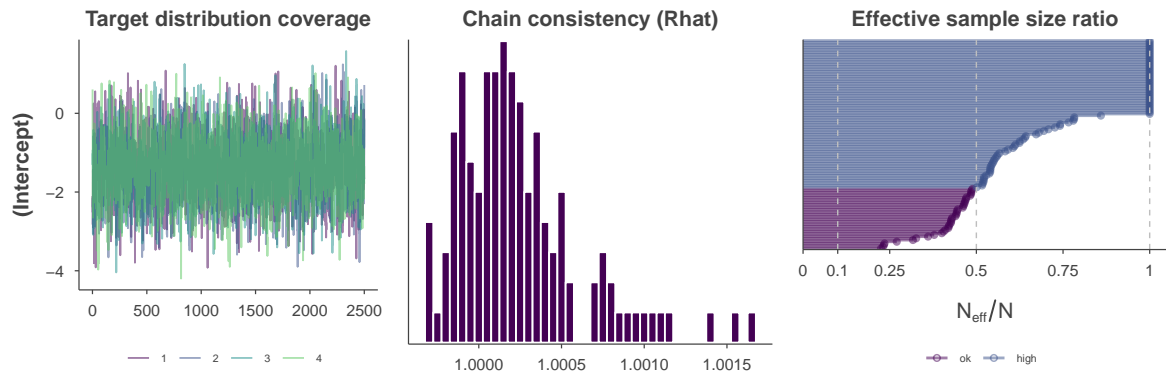

### 3.2.3 Model 3 convergence diagnostics plots

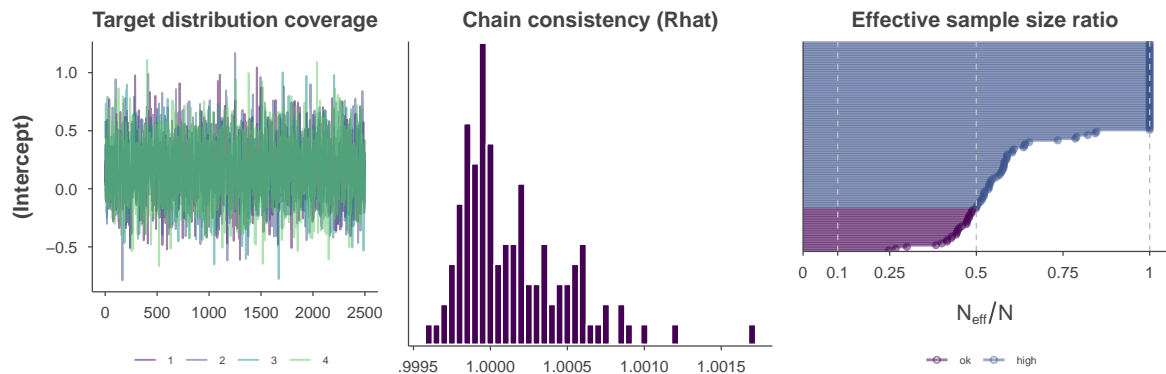

## 3.3 Posterior predictive density intervals

We draw samples from the posterior distributions of predicted values for each observation. The predicted value for each row in the original dataset will be a *distribution* of predicted values given one of the model equations, that is, each observation has a corresponding predictive distribution given the model formulation and the data. This results in  $N$  MCMC samples per data point (rows in the dataset), and  $N_{\text{rows}} \times N_{\text{mcmc}}$  total predictions.

To load the fitted model data and posterior distributions from the SRE package, run the `sre_models` function with the following options.

```
sre_models(refit = FALSE, save_dir = NULL)
seed <- 19850519
```

This will load the model objects into the global workspace. The posterior predictive distributions and the associated data can be merged with the `merge_data_and_posterior` function.

```
ppd.full <- merge_data_and_posterior(stanreg_full,
                                     post_fun = rstanarm::posterior_linpred,
                                     transform = TRUE,
                                     seed = seed)
```

```
ppd.full.binary <- merge_data_and_posterior(stanreg_full, seed = seed)
```

### 3.3.1 Subjects

Table S11: Each participants' posterior median accuracy, separated by AQ group intervals.

| AQ   | median  | SD.lower | SD.upper | CI.lower | CI.upper |
|------|---------|----------|----------|----------|----------|
| High | 0.78206 | 0.73882  | 0.82204  | 0.71044  | 0.84806  |
| High | 0.70814 | 0.66557  | 0.7594   | 0.63285  | 0.78738  |
| High | 0.69897 | 0.65383  | 0.74441  | 0.62416  | 0.77447  |
| High | 0.69733 | 0.64781  | 0.74415  | 0.61518  | 0.77372  |
| High | 0.68149 | 0.63667  | 0.73235  | 0.60472  | 0.76191  |
| High | 0.63784 | 0.58579  | 0.68311  | 0.55818  | 0.72077  |
| High | 0.61187 | 0.55747  | 0.66084  | 0.52832  | 0.69646  |
| High | 0.56342 | 0.51159  | 0.61318  | 0.47908  | 0.64595  |
| High | 0.52443 | 0.47217  | 0.57666  | 0.44036  | 0.60913  |
| High | 0.50311 | 0.44635  | 0.55716  | 0.4133   | 0.59211  |
| High | 0.44248 | 0.39015  | 0.49653  | 0.35611  | 0.53019  |
| High | 0.40966 | 0.3537   | 0.46051  | 0.3192   | 0.4929   |
| High | 0.39605 | 0.34462  | 0.43982  | 0.32213  | 0.47705  |
| High | 0.37266 | 0.3205   | 0.42379  | 0.28927  | 0.45845  |
| High | 0.325   | 0.27554  | 0.37811  | 0.24438  | 0.41026  |

Table S12: Each participants' posterior median accuracy, separated by AQ group intervals.

| AQ  | median  | SD.lower | SD.upper | CI.lower | CI.upper |
|-----|---------|----------|----------|----------|----------|
| Low | 0.85814 | 0.82263  | 0.89492  | 0.79956  | 0.91643  |
| Low | 0.85242 | 0.81636  | 0.89278  | 0.78379  | 0.90954  |
| Low | 0.84213 | 0.80231  | 0.88377  | 0.77636  | 0.90917  |
| Low | 0.74558 | 0.70364  | 0.79365  | 0.67094  | 0.81571  |
| Low | 0.71675 | 0.67009  | 0.76425  | 0.63939  | 0.79285  |
| Low | 0.70375 | 0.65848  | 0.7534   | 0.62381  | 0.7783   |
| Low | 0.68465 | 0.63613  | 0.72999  | 0.60558  | 0.76135  |
| Low | 0.65715 | 0.61155  | 0.70725  | 0.57744  | 0.73577  |
| Low | 0.64106 | 0.59122  | 0.69036  | 0.55604  | 0.71915  |
| Low | 0.63546 | 0.58775  | 0.68635  | 0.55758  | 0.71916  |
| Low | 0.63035 | 0.58303  | 0.68596  | 0.54516  | 0.71267  |
| Low | 0.62976 | 0.57814  | 0.68206  | 0.54276  | 0.71315  |
| Low | 0.62888 | 0.58038  | 0.68026  | 0.54347  | 0.70898  |
| Low | 0.61306 | 0.56053  | 0.66737  | 0.52634  | 0.69952  |
| Low | 0.60832 | 0.56173  | 0.6607   | 0.525    | 0.69289  |
| Low | 0.60328 | 0.54744  | 0.6519   | 0.51742  | 0.68993  |
| Low | 0.54016 | 0.48934  | 0.59578  | 0.45377  | 0.62556  |
| Low | 0.44871 | 0.3958   | 0.49902  | 0.36109  | 0.53135  |
| Low | 0.42334 | 0.36616  | 0.46998  | 0.33964  | 0.51214  |

### 3.3.2 AQ group

Posterior prediction comparisons between low vs. high scoring subjects.

Table S13: AQ group, posterior intervals.

| aq_category   | median  | SD.lower | SD.upper | CI.lower | CI.upper |
|---------------|---------|----------|----------|----------|----------|
| high symptoms | 0.55676 | 0.54257  | 0.57042  | 0.53379  | 0.57974  |
| low symptoms  | 0.65472 | 0.64346  | 0.66738  | 0.63541  | 0.67473  |
| all           | 0.61253 | 0.53671  | 0.67373  | 0.53947  | 0.67096  |

### 3.3.3 Sex differences

Posterior prediction comparisons between male and female for each AQ group.

| aq_category | median | SD.lower | SD.upper | CI.lower | CI.upper |
|-------------|--------|----------|----------|----------|----------|
|-------------|--------|----------|----------|----------|----------|

Table S14: Male-Female acc. diff., posterior intervals.

| aq_category   | median   | SD.lower  | SD.upper | CI.lower  | CI.upper |
|---------------|----------|-----------|----------|-----------|----------|
| high symptoms | 0.035684 | 0.0083043 | 0.065789 | -0.012182 | 0.082466 |
| low symptoms  | 0.078578 | 0.05504   | 0.10034  | 0.040189  | 0.11536  |

### 3.3.4 Contrasts

Posterior predictive density intervals for main, interaction, and simple effects.

Table S15: Posterior contrast intervals. (continued below)

| contrast             | effect                             | median | SD.lower |
|----------------------|------------------------------------|--------|----------|
| Interaction contrast | action type x AQ                   | 0.062  | 0.026    |
| Simple contrasts     | low AQ - high AQ                   | 0.098  | 0.08     |
| Simple contrasts     | complex actions - simple actions   | 0.19   | 0.17     |
| Simple effects       | low AQ - high (complex actions)    | 0.067  | 0.045    |
| Simple effects       | low AQ - high (simple actions)     | 0.13   | 0.1      |
| Simple effects       | complex actions - simple (low AQ)  | 0.15   | 0.13     |
| Simple effects       | complex actions - simple (high AQ) | 0.22   | 0.19     |
| complex acc          | complex high                       | 0.66   | 0.64     |
| complex acc          | complex low                        | 0.73   | 0.72     |
| simple acc           | simple high                        | 0.45   | 0.43     |
| simple acc           | simple low                         | 0.58   | 0.56     |

| SD.upper | CI.lower | CI.upper | Bayes $p$ |            |     |
|----------|----------|----------|-----------|------------|-----|
| 0.098    | 0.0021   | 0.12     | 0.041     | $p < .05$  | *   |
| 0.12     | 0.068    | 0.13     | 0         | $p < .001$ | *** |
| 0.2      | 0.15     | 0.22     | 0         | $p < .001$ | *** |
| 0.093    | 0.029    | 0.11     | 0.003     | $p < .01$  | **  |
| 0.16     | 0.084    | 0.17     | 0         | $p < .001$ | *** |
| 0.18     | 0.12     | 0.19     | 0         | $p < .001$ | *** |
| 0.24     | 0.17     | 0.26     | 0         | $p < .001$ | *** |
| 0.68     | 0.63     | 0.7      | 0         | $p < .001$ | *** |
| 0.75     | 0.71     | 0.76     | 0         | $p < .001$ | *** |
| 0.47     | 0.41     | 0.48     | 0         | $p < .001$ | *** |
| 0.6      | 0.55     | 0.61     | 0         | $p < .001$ | *** |

Table S17: Posterior contrast effect size intervals. (continued below)

| Effect size                        | median | SD.lower | SD.upper | CI.lower |
|------------------------------------|--------|----------|----------|----------|
| complex actions - simple (high AQ) | 0.45   | 0.36     | 0.53     | 0.33     |
| complex actions - simple (low AQ)  | 0.32   | 0.26     | 0.4      | 0.21     |
| low AQ - high (complex actions)    | 0.14   | 0.066    | 0.21     | 0.017    |
| low AQ - high (simple actions)     | 0.27   | 0.19     | 0.35     | 0.15     |
| complex actions - simple actions   | 0.39   | 0.33     | 0.44     | 0.29     |
| low AQ - high AQ                   | 0.21   | 0.16     | 0.27     | 0.11     |
| action type x AQ                   | 0.13   | 0.024    | 0.24     | -0.049   |

---

 CI.upper
 

---

0.6

0.45

0.26

0.41

0.48

0.29

0.3

### 3.3.5 Response time

Table S19: Trials removed for no response after 40 seconds.

| sub_sex | aq_category   | nSub | total |
|---------|---------------|------|-------|
| m       | low symptoms  | 4    | 4     |
| f       | low symptoms  | 2    | 4     |
| f       | high symptoms | 1    | 1     |
| m       | high symptoms | 1    | 1     |

Table S20: Posterior contrast intervals for response times. (continued below)

| contrast             | effect                           | median | SD.lower |
|----------------------|----------------------------------|--------|----------|
| Interaction contrast | action type x AQ                 | 0.054  | 0.0026   |
| Simple contrasts     | low AQ - high AQ                 | 0.1    | 0.075    |
| Simple contrasts     | complex actions - simple actions | 0.19   | 0.16     |
| Simple effects       | low AQ - high (complex actions)  | 0.074  | 0.039    |

| contrast       | effect                             | median | SD.lower |
|----------------|------------------------------------|--------|----------|
| Simple effects | low AQ - high (simple actions)     | 0.13   | 0.092    |
| Simple effects | complex actions - simple (low AQ)  | 0.16   | 0.13     |
| Simple effects | complex actions - simple (high AQ) | 0.22   | 0.18     |
| complex acc    | complex high                       | 0.67   | 0.64     |
| complex acc    | complex low                        | 0.74   | 0.72     |
| simple acc     | simple high                        | 0.45   | 0.42     |
| simple acc     | simple low                         | 0.58   | 0.55     |

| SD.upper | CI.lower | CI.upper | Bayes $p$ |            |     |
|----------|----------|----------|-----------|------------|-----|
| 0.1      | -0.031   | 0.14     | 0.14      | n.s.       |     |
| 0.13     | 0.058    | 0.14     | 0         | $p < .001$ | *** |
| 0.21     | 0.15     | 0.23     | 0         | $p < .001$ | *** |
| 0.11     | 0.013    | 0.13     | 0.021     | $p < .05$  | *   |
| 0.16     | 0.072    | 0.19     | 3e-04     | $p < .001$ | *** |
| 0.2      | 0.11     | 0.22     | 0         | $p < .001$ | *** |
| 0.25     | 0.15     | 0.28     | 0         | $p < .001$ | *** |
| 0.69     | 0.62     | 0.71     | 0         | $p < .001$ | *** |
| 0.76     | 0.7      | 0.78     | 0         | $p < .001$ | *** |
| 0.48     | 0.41     | 0.49     | 0         | $p < .001$ | *** |
| 0.6      | 0.54     | 0.62     | 0         | $p < .001$ | *** |

Table S22: RT contrast effects in original scale (seconds)

| contrast             | effect                             |     | RT_effect |
|----------------------|------------------------------------|-----|-----------|
| Interaction contrast | action type x AQ                   |     | 5.2       |
| Simple contrasts     | low AQ - high AQ                   | *** | 5.5       |
| Simple contrasts     | complex actions - simple actions   | *** | 6.1       |
| Simple effects       | low AQ - high (complex actions)    | *   | 5.4       |
| Simple effects       | low AQ - high (simple actions)     | *** | 5.7       |
| Simple effects       | complex actions - simple (low AQ)  | *** | 5.9       |
| Simple effects       | complex actions - simple (high AQ) | *** | 6.3       |
| complex acc          | complex high                       | *** | 11        |
| complex acc          | complex low                        | *** | 12        |
| simple acc           | simple high                        | *** | 8.3       |
| simple acc           | simple low                         | *** | 9.7       |

### 3.3.6 Viewpoint

Difference in participants' rotations of actions from the baseline position (recorded angle).

Table S23: Viewpoint, posterior intervals.

| Rotation | Median Diff. | SD.lower | SD.upper | CI.lower | CI.upper | $p(D = 0)$ |
|----------|--------------|----------|----------|----------|----------|------------|
| 0        | 0.00704      | -0.00416 | 0.0158   | -0.0087  | 0.026    | 0.225      |
| 135      | -0.0024      | -0.0122  | 0.00808  | -0.0205  | 0.0154   | 0.404      |
| 247      | -0.0155      | -0.0266  | -0.0012  | -0.0375  | 0.00507  | 0.0753     |

### 3.4 stanreg model summaries

Coefficient information from each of the fitted models.

#### 3.4.1 Model 1 - Full model

Number of coefficients for:  $recog\_acc \sim 1 + aq\_category \quad action\_category + aq\_score\_standard + sub\_sex + sub\_age\_scaled + (1 + action\_category | id) + (1 + angle | action)^*$

- fixed (*integer*): 7
- random:id (*integer*): 2
- random:action (*integer*): 4

=====

M1 (Full) model:

=====

```
stan_glmer
family:      binomial [logit]
formula:     recog_acc ~ 1 + aq_category * action_category + aq_score_standard +
              sub_sex + sub_age_scaled + (1 + action_category | id) + (1 +
              angle | action)
observations: 2448
```

```
-----
                                Median MAD_SD
(Intercept)                    -1.275  0.819
aq_categorylow symptoms         2.171  0.876
action_categorysimple actions    -1.088  0.278
aq_score_standard               1.351  0.571
sub_sexm                        0.309  0.251
sub_age_scaled                  0.442  0.254
aq_categorylow symptoms:action_categorysimple actions 0.297  0.296
```

Error terms:

| Groups | Name                          | Std.Dev. | Corr  |
|--------|-------------------------------|----------|-------|
| id     | (Intercept)                   | 0.7622   |       |
|        | action_categorysimple actions | 0.7038   | -0.56 |

---

```

action (Intercept)          0.3764
      angle0              0.2475    0.12
      angle135            0.2460   -0.15 -0.02
      angle247            0.2734   -0.24 -0.09  0.18

```

```
Num. levels: id 34, action 18
```

```
Sample avg. posterior predictive distribution of y:
```

```

      Median MAD_SD
mean_PPD 0.612  0.013

```

```
-----
```

```

* For help interpreting the printed output see ?print.stanreg
* For info on the priors used see ?prior_summary.stanreg

```

```
Priors for model 'stanreg'
```

```
-----
```

```

Intercept (after predictors centered)
~ student_t(df = 4, location = 0, scale = 10)

```

```
Coefficients
```

```

~ student_t(df = [4,4,4,...], location = [0,0,0,...], scale = [2.5,2.5,2.5,...])
  **adjusted scale = [2.500,2.500,3.328,...]

```

```
Covariance
```

```
~ decov(reg. = 2, conc. = 2, shape = 1, scale = 1)
```

```
-----
```

```
See help('prior_summary.stanreg') for more details
```

### 3.4.1.1 LOO-CV for Model 1

```

#>
#> Computed from 10000 by 2448 log-likelihood matrix
#>
#>           Estimate      SE
#> elpd_loo -1464.015  20.036
#> p_loo      74.792   1.468
#> looic     2928.029  40.071
#> -----
#> Monte Carlo SE of elpd_loo is 0.093.
#>
#> All Pareto k estimates are good (k < 0.5).
#> See help('pareto-k-diagnostic') for details.

```

### 3.4.2 Model 2 - Alternative model with no interaction

Number of coefficients for:  $\text{recog\_acc} \sim 1 + \text{aq\_category} + \text{action\_category} + \text{aq\_score\_standard} + \text{sub\_sex} + \text{sub\_age\_scaled} + (1 \mid \text{id}) + (1 + \text{angle} \mid \text{action})$

- fixed (*integer*): 6
- random:id (*integer*): 1
- random:action (*integer*): 4

```
=====
M2 (Alternative) model:
=====
```

```
stan_glmer
family:      binomial [logit]
formula:     recog_acc ~ 1 + aq_category + action_category + aq_score_standard +
               sub_sex + sub_age_scaled + (1 | id) + (1 + angle | action)
observations: 2448
```

```
-----
                                Median MAD_SD
(Intercept)                    -1.348  0.774
aq_categorylow symptoms         2.290  0.811
action_categorysimple actions -0.889  0.182
aq_score_standard               1.323  0.539
sub_sexm                       0.294  0.243
sub_age_scaled                  0.425  0.237
```

Error terms:

```
Groups Name      Std.Dev. Corr
id      (Intercept) 0.5940
action (Intercept) 0.3627
          angle0     0.2430    0.13
          angle135   0.2391   -0.14 -0.01
          angle247   0.2631   -0.24 -0.09  0.17
```

Num. levels: id 34, action 18

Sample avg. posterior predictive distribution of y:

```
          Median MAD_SD
mean_PPD 0.612  0.013
```

```
-----
* For help interpreting the printed output see ?print.stanreg
* For info on the priors used see ?prior_summary.stanreg
```

Priors for model 'stanreg'

```

-----
Intercept (after predictors centered)
~ student_t(df = 4, location = 0, scale = 10)

Coefficients
~ student_t(df = [4,4,4,...], location = [0,0,0,...], scale = [2.5,2.5,2.5,...])
  **adjusted scale = [2.500,2.500,3.328,...]

Covariance
~ decov(reg. = 2, conc. = 2, shape = 1, scale = 1)
-----
See help('prior_summary.stanreg') for more details

```

### 3.4.2.1 LOO-CV for Model 2

```

#>
#> Computed from 10000 by 2448 log-likelihood matrix
#>
#>           Estimate      SE
#> elpd_loo -1479.957 19.651
#> p_loo      53.825  0.987
#> looic      2959.914 39.302
#> -----
#> Monte Carlo SE of elpd_loo is 0.077.
#>
#> All Pareto k estimates are good (k < 0.5).
#> See help('pareto-k-diagnostic') for details.

```

### 3.4.3 Model 3 - Null model has no AQ or action type effects.

Number of coefficients for:  $recog\_acc \sim 1 + sub\_sex + sub\_age\_scaled + (1 | id) + (1 + angle | action)$

- fixed (*integer*): 3
- random:id (*integer*): 1
- random:action (*integer*): 4

```

=====
M3 (Null) model:
=====

```

```

stan_glmer
family:      binomial [logit]
formula:     recog_acc ~ 1 + sub_sex + sub_age_scaled + (1 | id) + (1 + angle |
              action)

```

```

observations: 2448
-----
              Median MAD_SD
(Intercept)   0.172  0.236
sub_sex       0.304  0.260
sub_age_scaled 0.430  0.259

Error terms:
Groups Name      Std.Dev. Corr
id   (Intercept) 0.6773
action (Intercept) 0.5771
      angle0      0.2677  -0.07
      angle135    0.2962  -0.06  0.00
      angle247    0.3344  -0.31 -0.08  0.25
Num. levels: id 34, action 18

Sample avg. posterior predictive distribution of y:
              Median MAD_SD
mean_PPD 0.612  0.013

-----
* For help interpreting the printed output see ?print.stanreg
* For info on the priors used see ?prior_summary.stanreg

Priors for model 'stanreg'
-----
Intercept (after predictors centered)
~ student_t(df = 4, location = 0, scale = 10)

Coefficients
~ student_t(df = [4,4], location = [0,0], scale = [2.5,2.5])
  **adjusted scale = [2.500,5.000]

Covariance
~ decov(reg. = 2, conc. = 2, shape = 1, scale = 1)
-----
See help('prior_summary.stanreg') for more details

```

### 3.4.3.1 LOO-CV for Model 3

```

#>
#> Computed from 10000 by 2448 log-likelihood matrix

```

```

#>
#>           Estimate      SE
#> elpd_loo -1481.619 19.492
#> p_loo      59.718  1.077
#> looic      2963.238 38.983
#> -----
#> Monte Carlo SE of elpd_loo is 0.082.
#>
#> All Pareto k estimates are good (k < 0.5).
#> See help('pareto-k-diagnostic') for details.

```

### 3.5 Model comparisons

#### 3.5.1 Expected log pointwise predictive densities

Approximate (Pareto-smoothed sampling) Leave-One-Out Cross-validation comparisons between Models 1–3.

Table S24: PSIS-LOO-CV model comparisons

|            | Ful(M1)* Alt(M2) | Ful(M1)* Nul(M3) | Alt(M2) Nul(M3) |
|------------|------------------|------------------|-----------------|
| ELPD_LOO L | -1464            | -1464            | -1480           |
| ELPD_LOO R | -1480            | -1482            | -1482           |
| ELPD_LOO   | -15.94           | -17.6            | -1.662          |
| DIFF.      |                  |                  |                 |
| SE DIFF.   | 5.614            | 5.965            | 2.103           |
| CI 2.5 %   | -26.95           | -29.3            | -5.785          |
| CI 97.5 %  | -4.933           | -5.907           | 2.461           |

### 3.5.2 Bayesian R-squared comparisons

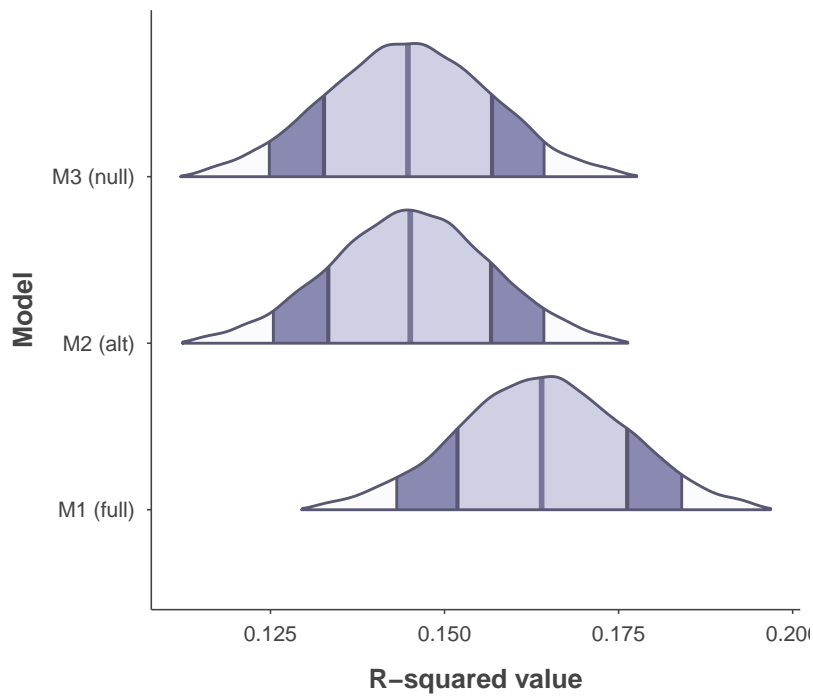

### 3.5.3 Posterior predictive checks

Comparisons between the mean accuracy for each subject and the mean posterior predictive accuracy density for each MCMC sample and subject. The plots are split by AQ group.

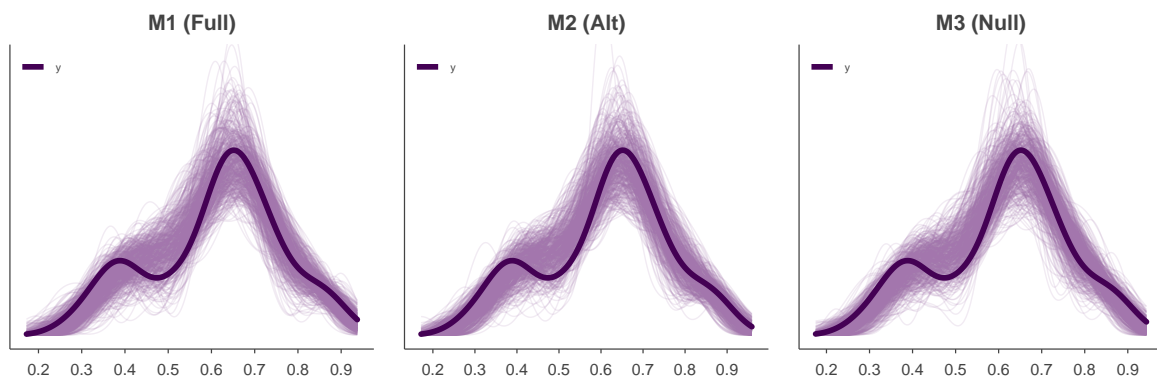

## 4 ADDITIONAL FIGURES

### 4.1 AQ group by action type, bar plot

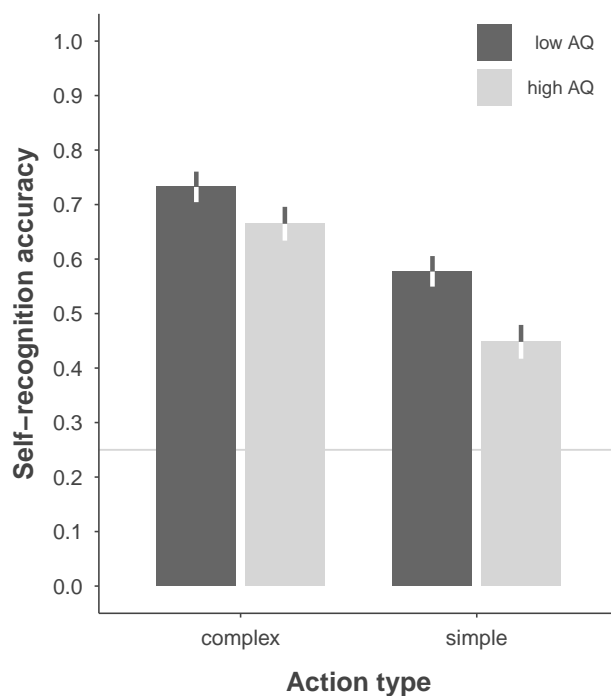

**Figure S1.** Mean self-recognition accuracy by AQ group and action type. Accuracy is averaged over viewpoints. Chance performance is shown by the grey horizontal line at 0.25, and within-subjects standard errors are shown for each bar

## 4.2 AQ group by action type, histograms

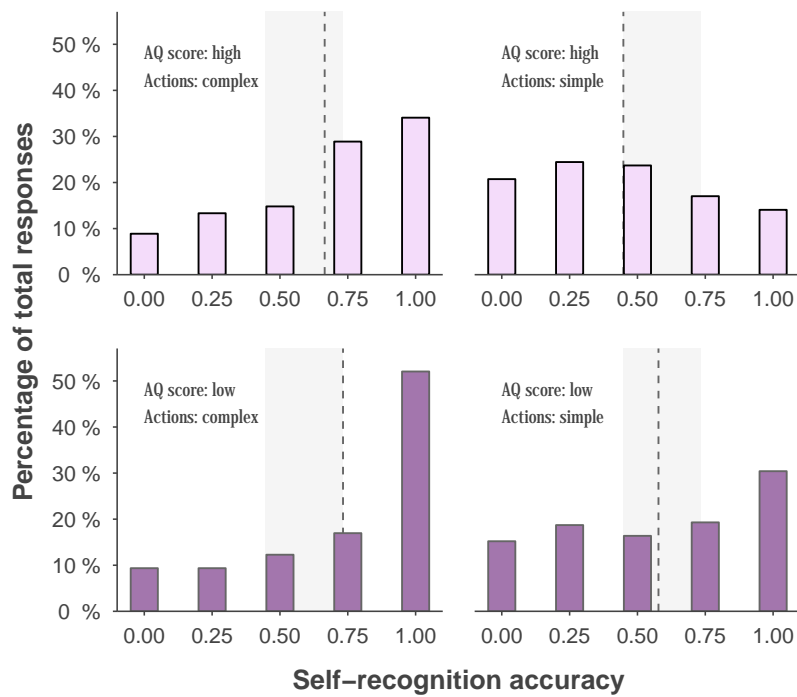

**Figure S2.** Histograms of each accuracy score by AQ group and action type. Accuracy is averaged over viewpoints. The dotted vertical lines indicate the mean accuracy for a given panel. The shaded region is the mean accuracy range across panels.

### 4.3 Posterior accuracy by actions

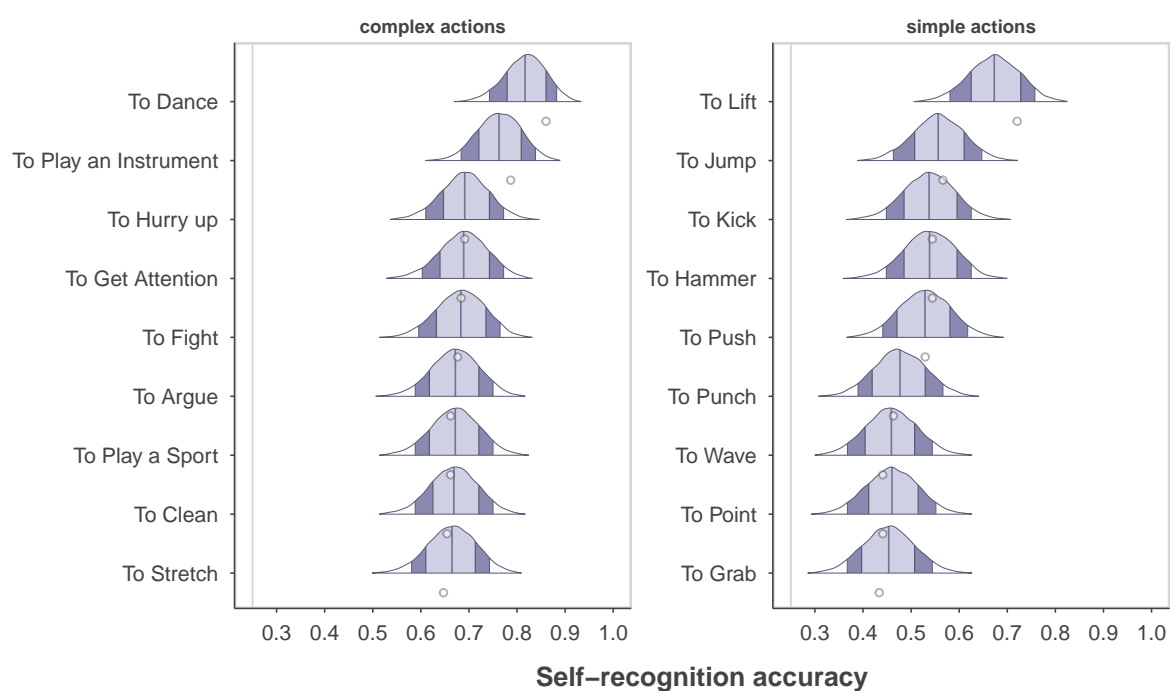

**Figure S3.** Posterior distributions of self-recognition accuracy for each action performed by the participants, categorized by action type. The white point in each distribution is the mean accuracy computed from the data, collapsed across AQ groups and viewpoint. The vertical grey line at 0.25 represents chance performance.

#### 4.4 AQ score by action type with gender points

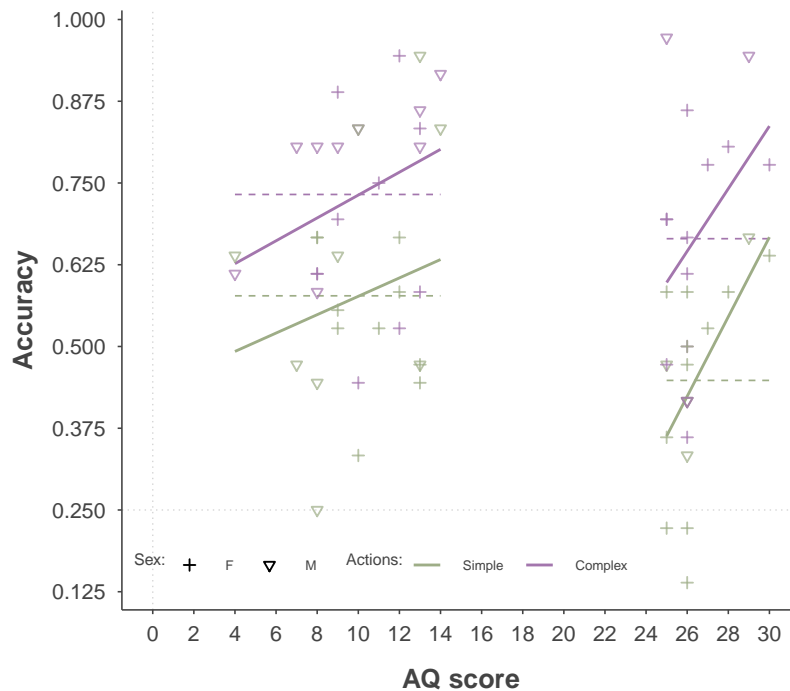

**Figure S4.** Interactions between AQ score and action complexity.

## 5 USING THE EXPORTED SRE PACKAGE FUNCTIONS

Loading the package materials

```
library(SRE)
```

Calling the package dataset

```
SRE
```

Alternatively, you may import using the `import_sre()` function to customize how the data is imported. If then this will import the dataset without refactoring the variables or standardizing.

```
SRE <- import_sre(raw=TRUE)
```

### 5.1 Refitting the models

To load or refit all the models, use the `sre_models` function. If `save_dir=NULL` and `refit=TRUE`, this will refit the default models and save all refitted models to a directory

called `sre_fitted_models` in your OS specific user/home directory. If `refit=FALSE` then it will load the saved models from the package's external data folder.

```
sre_models(refit = TRUE, save_dir = NULL)
```

If you specify a path for `save_dir`, all models can be saved and loaded from there. The `debug` option just runs a few iterations for each model.

```
model_refit_dir <- "./sre_models_example"
sre_models(refit = TRUE, save_dir = model_refit_dir, debug = FALSE)
```

### 5.1.1 Loading fitted models

```
sre_models(refit = FALSE, save_dir = NULL)
```

This will load the following R objects into the global environment.

- `stanreg_full`: Model 1
- `loo_full`: LOO for Model 1
- `stanreg_alt`: Model 2
- `loo_alt`: LOO for Model 2
- `stanreg_null`: Model 3
- `loo_null`: LOO for Model 3

## REFERENCES

Carpenter, B., Gelman, A., Hoffman, M., Lee, D., Goodrich, B., Betancourt, M., ... Riddell, A. (2017). Stan: A probabilistic programming language. *Journal of Statistical Software, Articles*, 76(1), 1–32. <https://doi.org/10.18637/jss.v076.i01>

Ghosh, J., Li, Y., & Mitra, R. (2015). On the Use of Cauchy Prior Distributions for Bayesian Logistic Regression. *ArXiv E-Prints*. Retrieved from <http://arxiv.org/abs/1507.07170>

Homan, M. D., & Gelman, A. (2014). The no-u-turn sampler: Adaptively setting path lengths in hamiltonian monte carlo. *Journal of Machine Learning Research*, 15(1), 1593–1623. Retrieved from <http://dl.acm.org/citation.cfm?id=2627435.2638586>

Lewandowski, D., Kurowicka, D., & Joe, H. (2009). Generating random correlation matrices based on vines and extended onion method. *Journal of Multivariate Analysis*, 100(9), 1989–2001. <https://doi.org/doi.org/10.1016/j.jmva.2009.04.008>
